# Supplementary material for: A high entropy O3-Na1.0Li0.1Ni0.3Fe0.1Mn0.25Ti0.25O2 cathode with reversible phase transitions and superior electrochemical performances for sodium-ion batteries
Source: Royal Society of Chemistry journal article supplement (doi:10.1039/d4ta01137f), 2024-01-01
Supplement: d4ta01137f1.pdf [file d4ta01137f1.pdf]

## Supporting Information

### **A high entropy O<sub>3</sub>-Na<sub>1.0</sub>Li<sub>0.1</sub>Ni<sub>0.3</sub>Fe<sub>0.1</sub>Mn<sub>0.25</sub>Ti<sub>0.25</sub>O<sub>2</sub> cathode with reversible phase transitions and superior electrochemical performances for sodium-ion batteries**

*Arindam Ghosh,<sup>†,‡,§</sup> Rashmi Hegde,<sup>†,‡,§</sup> and Premkumar Senguttuvan<sup>†,‡,§,\*</sup>*

<sup>†</sup>New Chemistry Unit, <sup>‡</sup>International Centre for Materials Science and <sup>§</sup>School of Advanced Materials, Jawaharlal Nehru Centre for Advanced Scientific Research, Jakkur, Bangalore-560064, Karnataka, India.

#### Author information

\*Corresponding Author. Jawaharlal Nehru Centre for Advanced Scientific Research, Jakkur, Bangalore-560064, Karnataka, India

\*E-mail: [prem@jncasr.ac.in](mailto:prem@jncasr.ac.in).

#### ORCID

Premkumar Senguttuvan: 0000-0001-8465-5896

Arindam Ghosh: 0000-0001-9014-7345

**Equation S1:** The ideal configurational entropy ( $S_{conf}$ ) of NFTMO material was calculated using the formula-

$$S_{conf} = -R \sum_i x_i \ln x_i$$

Where  $R$  is the gas constant and  $x_i$  is the mole fraction of the  $i$ th element. The chemical composition of NFMTO is  $\text{Na}_{1.0}\text{Li}_{0.1}\text{Ni}_{0.3}\text{Fe}_{0.1}\text{Mn}_{0.25}\text{Ti}_{0.25}\text{O}_2$ . therefore, the mole fraction of Li, Ni, Fe, Mn and Ti is 0.1, 0.3, 0.1, 0.25 and 0.25 respectively.

Putting the values in Equation 2 we get,

$$S_{conf} = -R(0.1\ln 0.1 + 0.3\ln 0.3 + 0.1\ln 0.1 + 0.25\ln 0.25 + 0.25\ln 0.25) = 1.515R$$

**Equation S2:** The  $\text{Na}^+$ -ion diffusion coefficient was calculated by applying the galvanostatic intermittent titration technique (GITT) using the following formula<sup>1</sup> -

$$D_{\text{Na}^+} = \frac{4}{\pi\tau} \left( \frac{m_B V_m}{M_B S} \right)^2 \left( \frac{\Delta E_S}{\Delta E_\tau} \right)^2 \quad \left( \text{where, } \tau \ll \frac{L^2}{D_{\text{Na}^+}} \right)$$

$D_{\text{Na}^+}$  is the diffusion coefficient of  $\text{Na}^+$ -ion,  $\tau$  is the constant current pulse time (s),  $m_B$  is the weight of active material (g),  $V_m$  is the molar volume ( $\text{cm}^3 \text{mol}^{-1}$ ) of the material,  $M_B$  is the molecular weight of the cathode material ( $\text{g mol}^{-1}$ ),  $S$  is the contact area of the electrolyte/electrode surface ( $\text{cm}^2$ ),  $\Delta E_s$  is the steady-state voltage change,  $\Delta E_\tau$  is the transient voltage change during the constant current pulse and  $L$  is the diffusion distance of  $\text{Na}^+$  from lattice to liquid electrolyte.

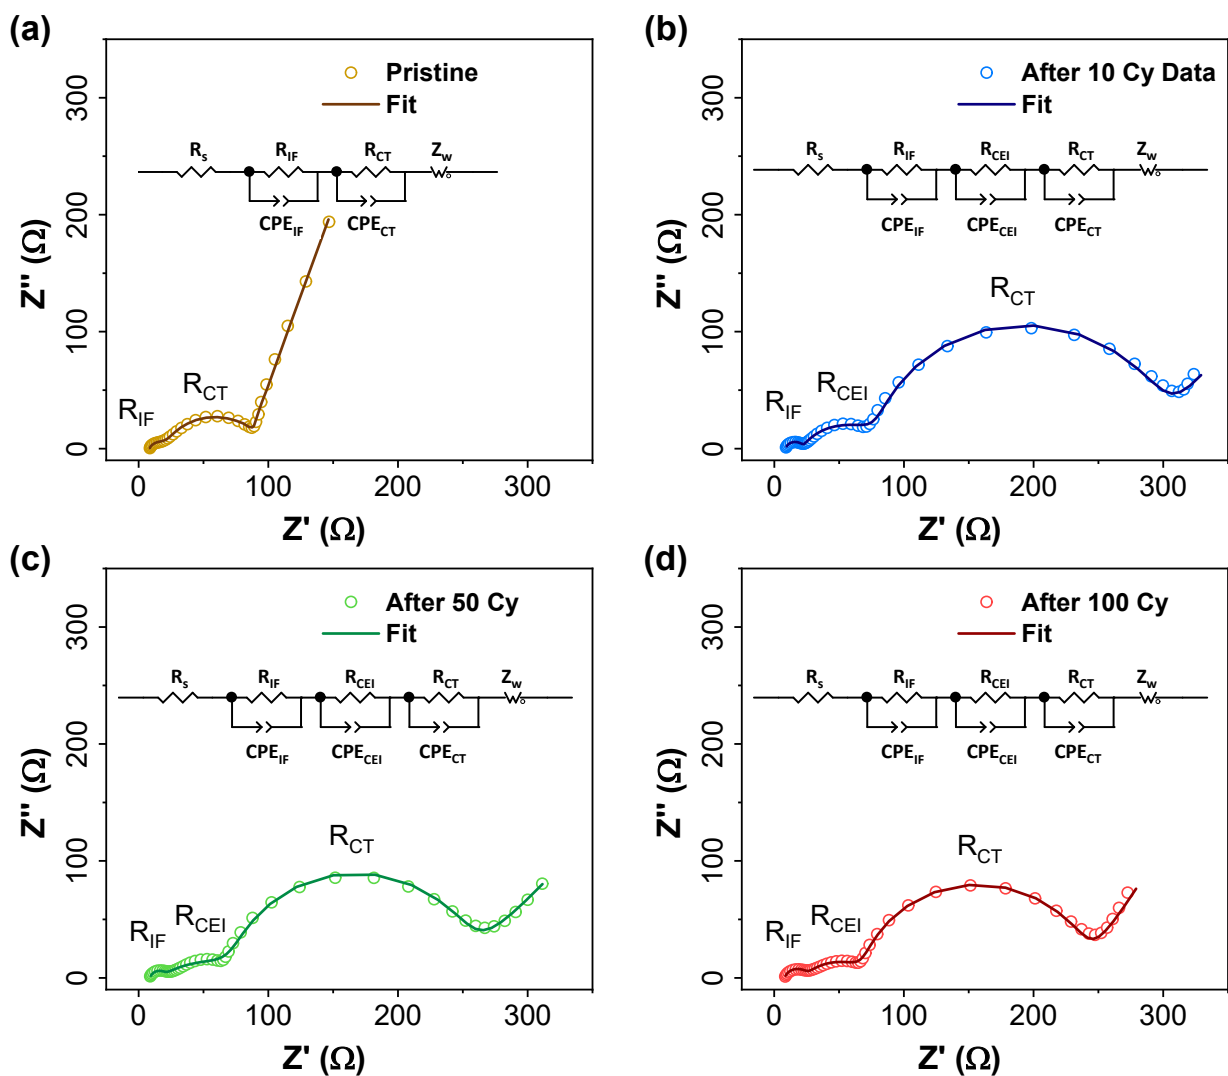

**Figure S1:** Nyquist plots with equivalent circuit models for fitting the electrochemical impedance spectroscopy data of NFTMO cathode collected at (a) pristine, (b) after 10 cycles, (c) after 50 cycles, (d) after 100 cycles.

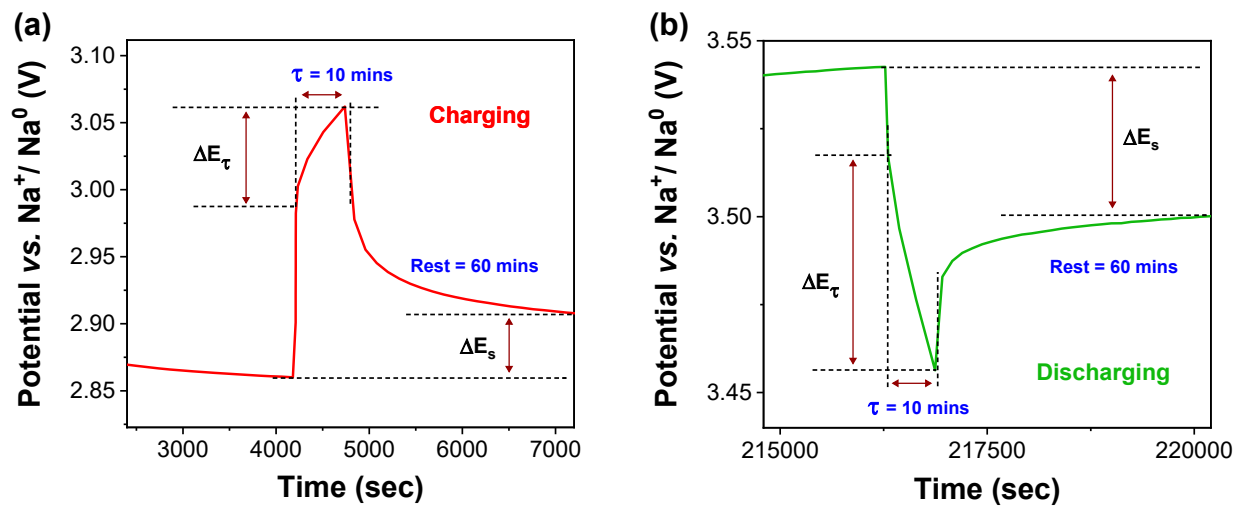

**Figure S2:** The schematic diagram of a single current pulse for GITT of (a) charging and (b) discharging process and the corresponding parameters.

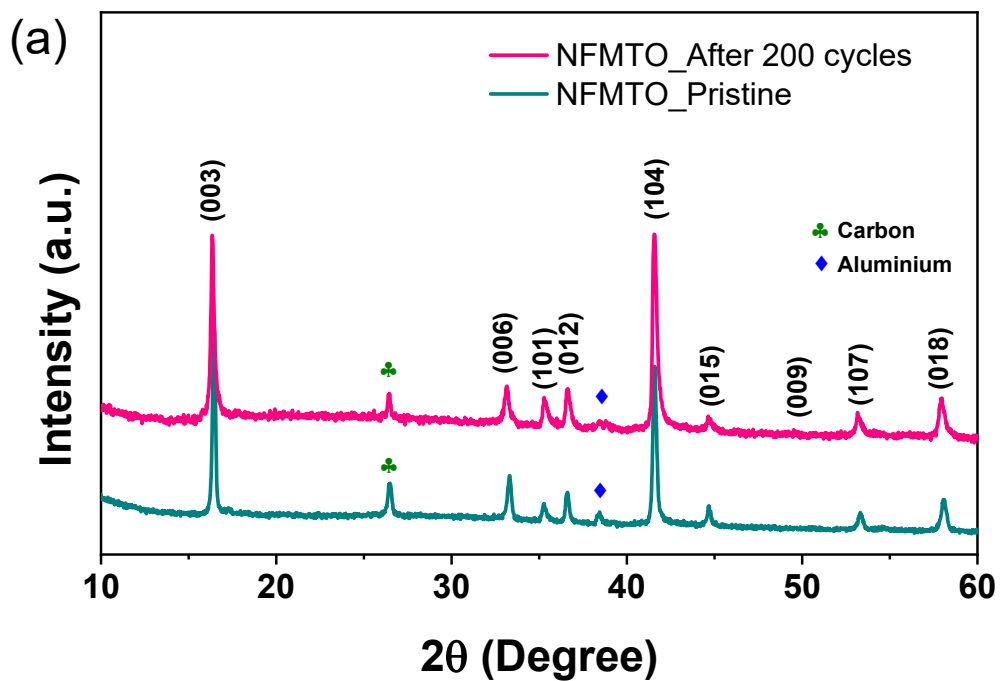

Pristine

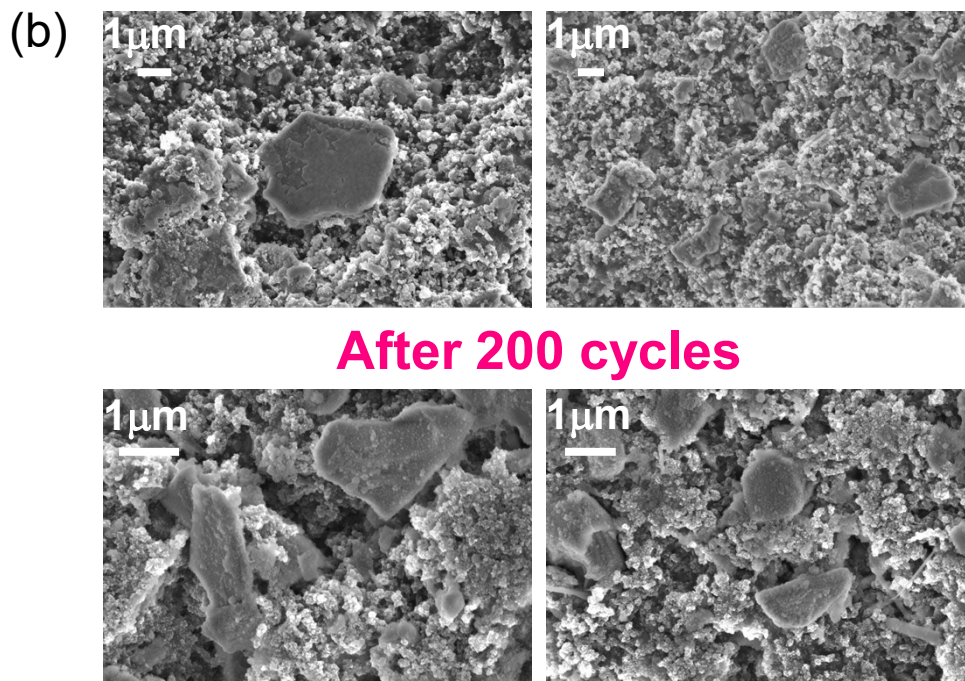

**Figure S3:** (a) PXRD and (b) SEM images of NFMTO electrode in the pristine state and after 200 cycles in the potential window of 4.0-2.0 V vs. Na<sup>+</sup>/Na<sup>0</sup> at 0.1 C rate.

**Table S1:** Structural parameters of  $\text{Na}_{1.0}\text{Li}_{0.1}\text{Ni}_{0.3}\text{Fe}_{0.1}\text{Mn}_{0.25}\text{Ti}_{0.25}\text{O}_2$  cathode

Title  $\text{Na}_{1.0}\text{Li}_{0.1}\text{Ni}_{0.3}\text{Fe}_{0.1}\text{Mn}_{0.25}\text{Ti}_{0.25}\text{O}_2$   
 Lattice type R  
 Space group name R -3 m  
 Space group number 166

Lattice parameters

$a = 2.979(4) \text{ \AA}$       $\alpha = 90.00^\circ$   
 $b = 2.979(4) \text{ \AA}$       $\beta = 90.00^\circ$   
 $c = 16.020(5) \text{ \AA}$       $\gamma = 120.00^\circ$   
 $V = 123.165 \text{ \AA}^3$

Structure parameters

| Atom | x     | y     | z     | Occ.  | U     | Site | Sym |
|------|-------|-------|-------|-------|-------|------|-----|
| 1 O  | 0.000 | 0.000 | 0.236 | 1.000 | 0.009 | 6c   | 3m  |
| 2 Fe | 0.000 | 0.000 | 0.500 | 0.100 | 0.000 | 3b   | -3m |
| 3 Mn | 0.000 | 0.000 | 0.500 | 0.250 | 0.000 | 3b   | -3m |
| 4 Ni | 0.000 | 0.000 | 0.500 | 0.300 | 0.000 | 3b   | -3m |
| 5 Ti | 0.000 | 0.000 | 0.500 | 0.250 | 0.000 | 3b   | -3m |
| 6 Li | 0.000 | 0.000 | 0.500 | 0.100 | 0.000 | 3b   | -3m |
| 7 Na | 0.000 | 0.000 | 0.000 | 1.000 | 0.028 | 3a   | -3m |

**Table S2:** Electrochemical performance comparison of reported multi-element based (binary to high entropy) layered oxide cathode materials.

| No. | Material                                                                                    | Potential Window (V vs $\text{Na}^+/\text{Na}^0$ ) | Applied Rate (C) | $Q_{\text{Dis}}$ ( $\text{mAh}\cdot\text{g}^{-1}$ ) | $V_{\text{avg}}$ (V) | Energy Density ( $\text{Whkg}^{-1}$ ) | Capacity Retention       | Ref. |
|-----|---------------------------------------------------------------------------------------------|----------------------------------------------------|------------------|-----------------------------------------------------|----------------------|---------------------------------------|--------------------------|------|
| [1] | $\text{NaNi}_{0.5}\text{Mn}_{0.5}\text{O}_2$                                                | 3.8-2.2                                            | 0.02 C           | 125                                                 | ~2.9                 | 362.5                                 | 75% (0.1 C, 50 cycles)   | 2    |
| [2] | $\text{NaNi}_{0.33}\text{Mn}_{0.33}\text{Fe}_{0.33}\text{O}_2$                              | 4.0-2.0                                            | 0.1 C            | 136                                                 | 3.15                 | 428.4                                 | 85.88% (0.1C, 50 cycles) | 3    |
| [3] | $\text{NaNi}_{0.5}\text{Mn}_{0.2}\text{Ti}_{0.3}\text{O}_2$                                 | 4.0-2.0                                            | 0.05 C           | 135                                                 | 3.2                  | 432                                   | 85% (1 C, 200 cycles)    | 4    |
| [4] | $\text{Na}[\text{Ni}_{0.4}\text{Mn}_{0.4}\text{Fe}_{0.2}]_{0.95}\text{Ti}_{0.05}\text{O}_2$ | 4.0-2.0                                            | 0.1 C            | 160.7                                               | ~3.1                 | 498.2                                 | 83.8% (1C, 200 cycles)   | 5    |

|      |                                                                                                                                                             |         |        |       |       |       |                                                |          |
|------|-------------------------------------------------------------------------------------------------------------------------------------------------------------|---------|--------|-------|-------|-------|------------------------------------------------|----------|
| [5]  | $\text{NaNi}_{0.4}\text{Fe}_{0.2}\text{Mn}_{0.2}\text{Ti}_{0.2}\text{O}_2$                                                                                  | 4.2-2.0 | 0.1 C  | 145   | 3.2   | 464   | 84% (0.1 C, 200 cycles)                        | 6        |
| [6]  | $\text{NaNi}_{0.45}\text{Mn}_{0.2}\text{Ti}_{0.3}\text{Zr}_{0.05}\text{O}_2$                                                                                | 4.0-2.0 | 0.05 C | 141.4 | 3.0   | 424   | 70% (0.05 C, 200 cycles)                       | 7        |
| [7]  | $\text{NaNi}_{0.45}\text{Mn}_{0.4}\text{Ti}_{0.1}\text{Cu}_{0.05}\text{O}_2$                                                                                | 4.0-2.0 | 0.1 C  | 124   | 3.1   | 384   | 70.2% (1 C, 500 cycles)                        | 8        |
| [8]  | $\text{NaNi}_{0.25}\text{Co}_{0.25}\text{Mn}_{0.25}\text{Ti}_{0.25}\text{O}_2$                                                                              | 3.9-2.0 | 0.1 C  | 116   | 3.15  | 365.4 | 75% (5 C, 400 cycles)                          | 9        |
| [9]  | $\text{Na}_{0.85}\text{Li}_{0.1}\text{Ni}_{0.175}\text{Fe}_{0.2}\text{Mn}_{0.525}\text{O}_2$                                                                | 4.2-2.0 | 0.1 C  | 130   | ~3.4  | 429   | 95% (1 C, 100 cycles)                          | 10       |
| [10] | $\text{NaNi}_{0.3}\text{Cu}_{0.1}\text{Fe}_{0.2}\text{Mn}_{0.2}\text{Ti}_{0.2}\text{O}_2$                                                                   | 3.9-2.0 | 0.1 C  | 130   | ~3.15 | 409.5 | 71% (0.5 C, 500 cycles)                        | 11       |
| [11] | $\text{NaNi}_{0.25}\text{Co}_{0.25}\text{Fe}_{0.25}\text{Mn}_{0.125}\text{Ti}_{0.125}\text{O}_2$                                                            | 4.1-2.0 | 0.1 C  | 128   | ~3.1  | 396.8 | 96% (1 C, 100 cycles)                          | 12       |
| [12] | $\text{NaNi}_{0.12}\text{Cu}_{0.12}\text{Mg}_{0.12}\text{Fe}_{0.15}\text{Co}_{0.15}\text{Mn}_{0.1}\text{Ti}_{0.1}\text{Sn}_{0.1}\text{Sb}_{0.04}\text{O}_2$ | 3.9-2.0 | 0.1 C  | 110   | ~3.1  | 341   | 83% (0.5 C, 500 cycles)                        | 13       |
| [13] | $\text{NaNi}_{0.25}\text{Mg}_{0.05}\text{Cu}_{0.1}\text{Fe}_{0.2}\text{Mn}_{0.2}\text{Ti}_{0.1}\text{Sn}_{0.1}\text{O}_2$                                   | 4.0-2.0 | 0.1 C  | 130.8 | 3.21  | 421   | 75% (1 C, 500 cycles)                          | 14       |
| [14] | $\text{Na}_{0.83}\text{Li}_{0.1}\text{Ni}_{0.25}\text{Co}_{0.2}\text{Mn}_{0.15}\text{Ti}_{0.15}\text{Sn}_{0.15}\text{O}_{2-\delta}$                         | 4.2-2.0 | 0.1 C  | 123.3 | ~3.2  | 394.6 | 87.2% (2 C, 200 cycles)                        | 15       |
| [15] | $\text{NaLi}_{0.1}\text{Ni}_{0.3}\text{Fe}_{0.1}\text{Mn}_{0.25}\text{Ti}_{0.25}\text{O}_2$                                                                 | 4.0-2.0 | 0.1 C  | 123   | 3.2   | 393.6 | 88% (1 C, 200 cycles)<br>77% (2 C, 400 cycles) | Our Work |

**Table S3:** Fitted parameters from EIS of NFMTO cathode collected at (a) pristine, (b) after 10 cycles, (c) after 50 cycles, (d) after 100 cycles.

| State            | $R_s$ ( $\Omega$ ) | $R_{IF}$ ( $\Omega$ ) | $R_{CEI}$ ( $\Omega$ ) | $R_{CT}$ ( $\Omega$ ) |
|------------------|--------------------|-----------------------|------------------------|-----------------------|
| Pristine         | 8.094              | 13.25                 | -                      | 72.01                 |
| After 10 Cycles  | 8.79               | 12.76                 | 59.9                   | 210                   |
| After 50 Cycles  | 8.44               | 15.39                 | 39.06                  | 163.8                 |
| After 100 Cycles | 8.16               | 15.76                 | 47.34                  | 161.1                 |

## References:

- 1 W. Weppner and R. A. Huggins, *J. Electrochem. Soc.*, 1977, **124**, 1569.
- 2 S. Komaba, N. Yabuuchi, T. Nakayama, A. Ogata, T. Ishikawa and I. Nakai, *Inorg. Chem.*, 2012, **51**, 6211–6220.
- 3 H. Wang, X.-Z. Liao, Y. Yang, X. Yan, Y.-S. He and Z.-F. Ma, *J. Electrochem. Soc.*, 2016, **163**, A565–A570.
- 4 P.-F. Wang, H.-R. Yao, X.-Y. Liu, J.-N. Zhang, L. Gu, X.-Q. Yu, Y.-X. Yin and Y.-G. Guo, *Adv. Mater.*, 2017, **29**, 1700210.
- 5 H. Zhao, J. Li, W. Liu, H. Xu, X. Gao, J. Shi, K. Yu and X. Ding, *Electrochim. Acta*, 2021, **388**, 138561.
- 6 X. Sun, Y. Jin, C. Y. Zhang, J. W. Wen, Y. Shao, Y. Zang and C. H. Chen, *J. Mater. Chem. A*, 2014, **2**, 17268–17271.
- 7 M. Leng, J. Bi, W. Wang, Z. Xing, W. Yan, X. Gao, J. Wang and R. Liu, *J. Alloys Compd.*, 2020, **816**, 152581.
- 8 H. R. Yao, P. F. Wang, Y. Gong, J. Zhang, X. Yu, L. Gu, C. Ouyang, Y. X. Yin, E. Hu, X. Q. Yang, E. Stavitski, Y. G. Guo and L. J. Wan, *J. Am. Chem. Soc.*, 2017, **139**, 8440–8443.
- 9 X. Zhang, K. Jiang, S. Guo, X. Mu, X. Zhang, P. He, M. Han and H. Zhou, *Chem. Commun.*, 2018, **54**, 12167–12170.
- 10 Y. You, S. Xin, H. Y. Asl, W. Li, P. F. Wang, Y. G. Guo and A. Manthiram, *Chem*, 2018, **4**, 2124–2139.



- 11 C. C. Lin, H. Y. Liu, J. W. Kang, C. C. Yang, C. H. Li, H. Y. T. Chen, S. C. Huang, C. S. Ni, Y. C. Chuang, B. H. Chen, C. K. Chang and H. Y. Chen, *Energy Storage Mater.*, 2022, **51**, 159–171.
- 12 J. L. Yue, W. W. Yin, M. H. Cao, S. Zulipiya, Y. N. Zhou and Z. W. Fu, *Chem. Commun.*, 2015, **51**, 15712–15715.
- 13 C. Zhao, F. Ding, Y. Lu, L. Chen and Y. Hu, *Angew. Chemie Int. Ed.*, 2020, **59**, 264–269.
- 14 F. Ding, C. Zhao, D. Xiao, X. Rong, H. Wang, Y. Li, Y. Yang, Y. Lu and Y.-S. Hu, *J. Am. Chem. Soc.*, 2022, **144**, 8286–8295.
- 15 H. Wang, X. Gao, S. Zhang, Y. Mei, L. Ni, J. Gao, H. Liu, N. Hong, B. Zhang, F. Zhu, W. Deng, G. Zou, H. Hou, X. Y. Cao, H. Chen and X. Ji, *ACS Nano*, 2023, **17**, 12530–12543.
